# Supplementary material for: Multi-color electrochromism from coordination nanosheets based on a terpyridine-Fe(ii) complex
Source: Royal Society of Chemistry journal article supplement (doi:10.1039/c9dt02980j), 2019-01-01
Supplement: c9dt02980j1.pdf [file c9dt02980j1.pdf]

## Electronic Supplementary information

### Multi-color electrochromism from coordination nanosheets based on terpyridine-Fe(II) complex

Yu Kuai,<sup>1</sup> Weijun Li,<sup>1</sup> Yujie Dong,<sup>\*,1</sup> Wai-Yeung Wong,<sup>\*,2</sup> Shuanma Yan,<sup>1</sup> Yuyu Dai,<sup>1</sup> and Cheng Zhang<sup>\*,1</sup>

<sup>1</sup> State Key Laboratory Breeding Base of Green Chemistry Synthesis Technology, College of Chemical Engineering, Zhejiang University of Technology, Hangzhou 310014, P. R. China. *E-mail: dongyujie@zjut.edu.cn, czhang@zjut.edu.cn*

<sup>2</sup> Department of Applied Biology & Chemical Technology, The Hong Kong Polytechnic University, Hung Hom, Hong Kong, P. R. China. *E-mail: wai-yeung.wong@polyu.edu.hk*

Keywords: multi-color electrochromism, nanosheet, self-assembly, terpyridine, triphenylamine

**Table S1.** The energy dispersive spectrometer (EDS) data of the nanosheet

| element        | C      | N     | O      | F     | Si    | Fe    | In     | Sn    |
|----------------|--------|-------|--------|-------|-------|-------|--------|-------|
| Atomic percent | 34.61% | 2.37% | 34.61% | 5.46% | 5.00% | 0.46% | 16.37% | 1.12% |

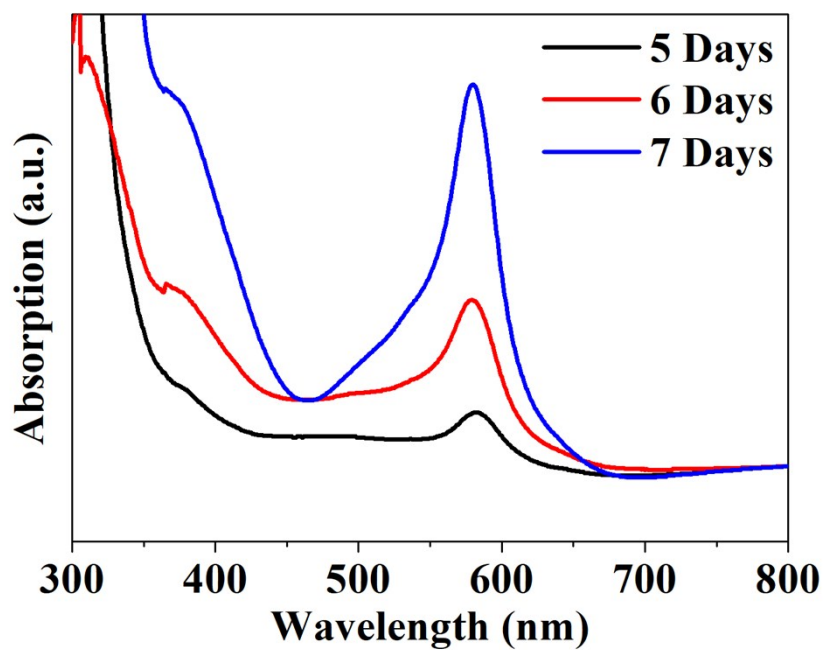

**Fig. S1.** UV-vis spectra of the nanosheets with different reaction time.

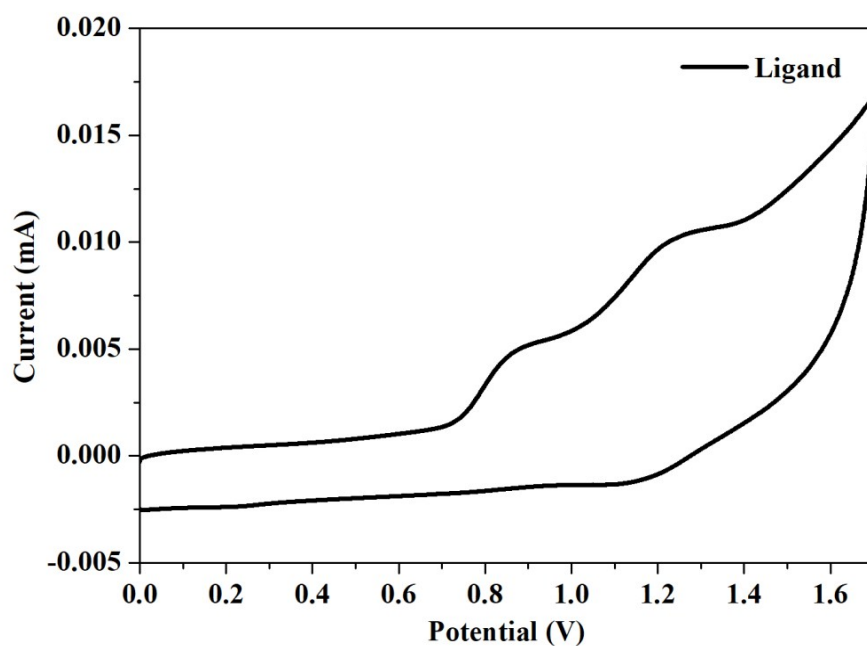

**Fig. S2.** The CV of the ligand performed by a three-compartment system in a solution of acetonitrile containing 0.1 M  $\text{Bu}_4\text{NClO}_4$ .

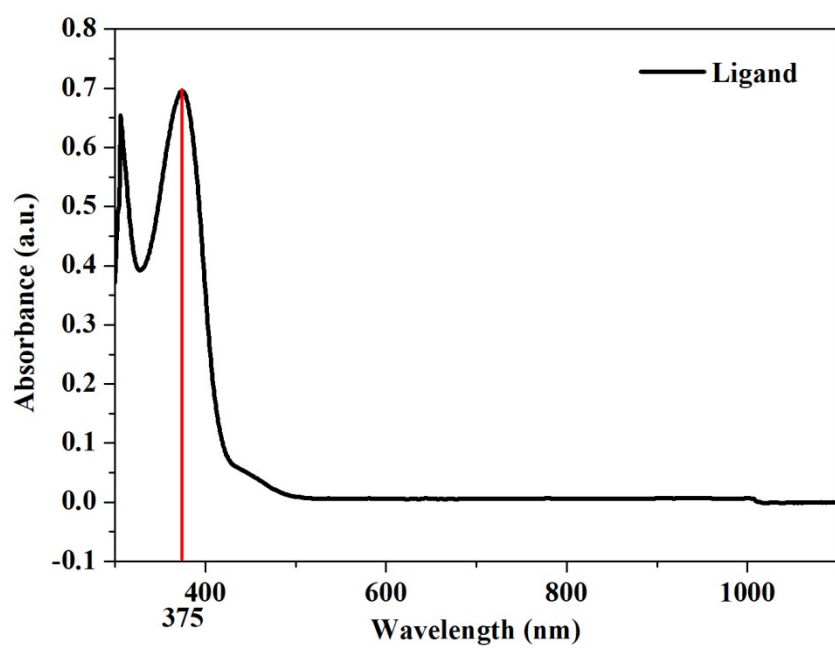

**Fig. S3.** UV-vis spectrum of the monomer ligand TPA-TPY dissolved in dichloromethane.

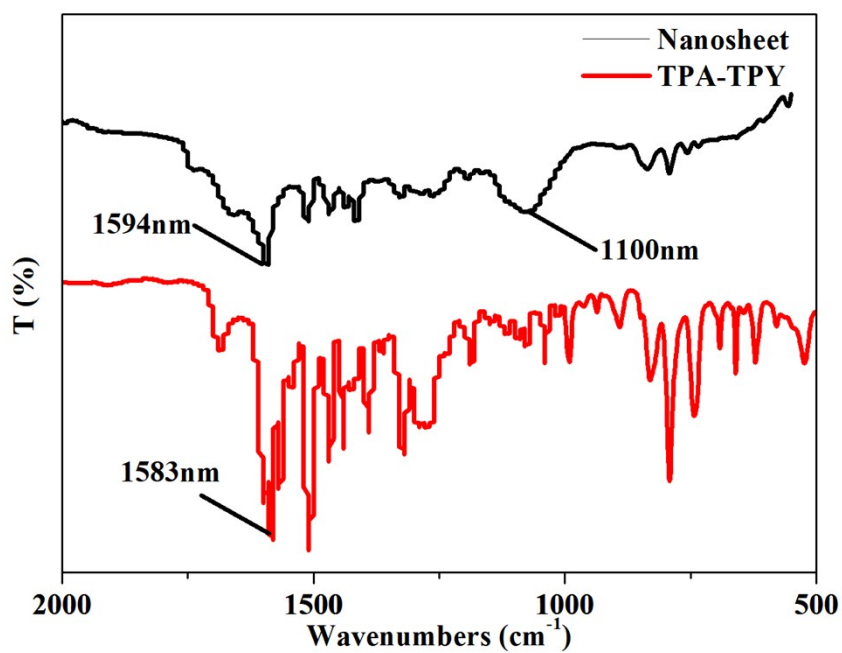

**Fig. S4.** IR spectral of the nanosheet and the ligand TPA-TPY.

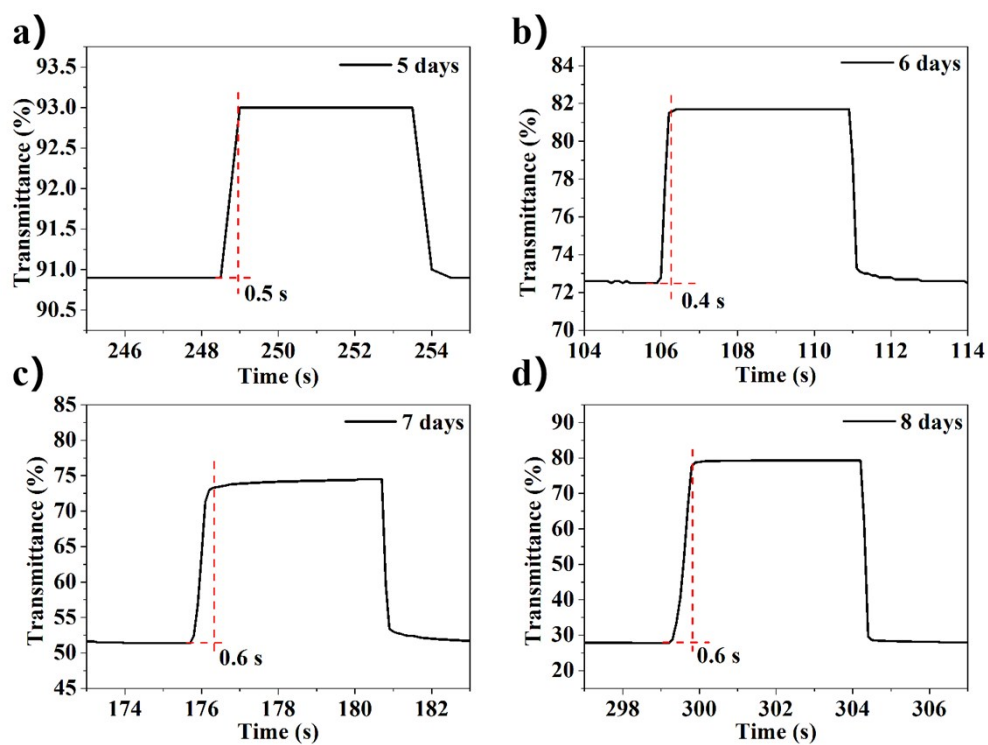

**Fig. S5.** Switching time of nanosheet with the reaction time for coloring of (a) 5 days, (b) 6 days, (c) 7 days and (d) 8 days.

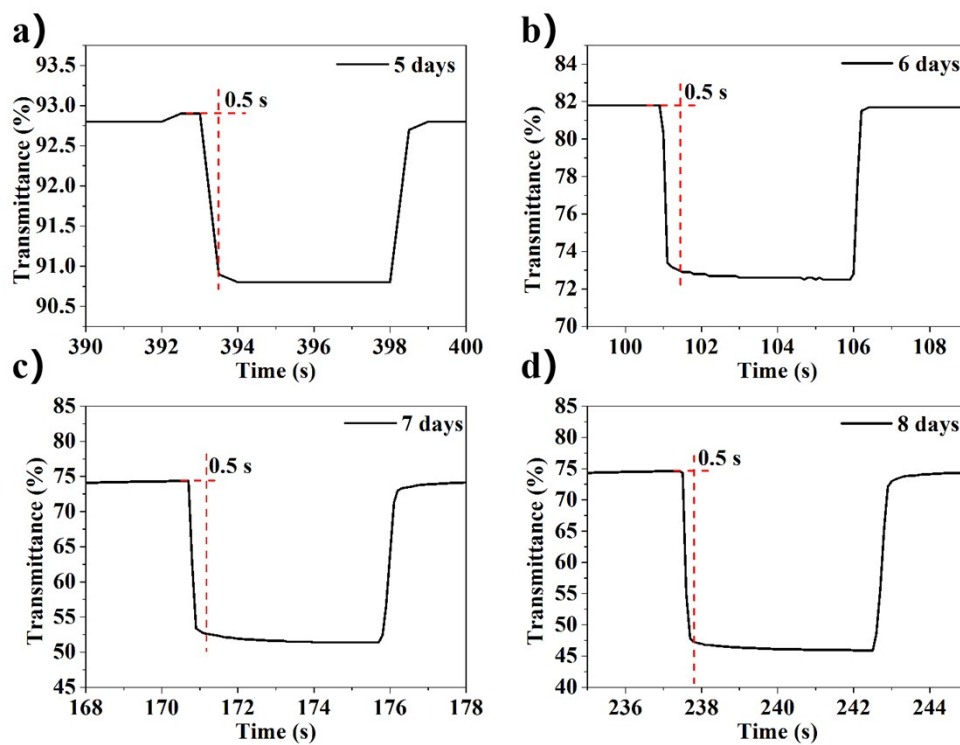

**Fig. S6.** Switching time of discoloring of nanosheet with the reaction time for (a) 5 days, (b) 6 days, (c) 7 days and (d) 8 days.

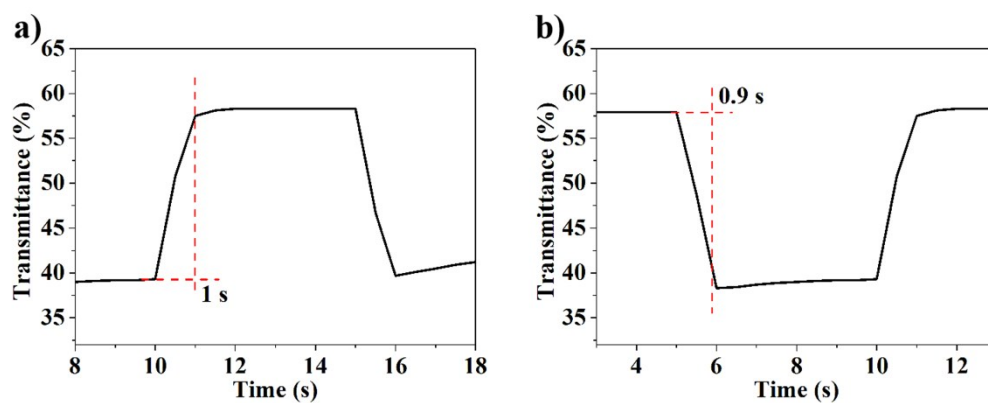

**Fig. S7.** Switching time of (a) coloring and (b) discoloring of the solid-state electrochromic device.

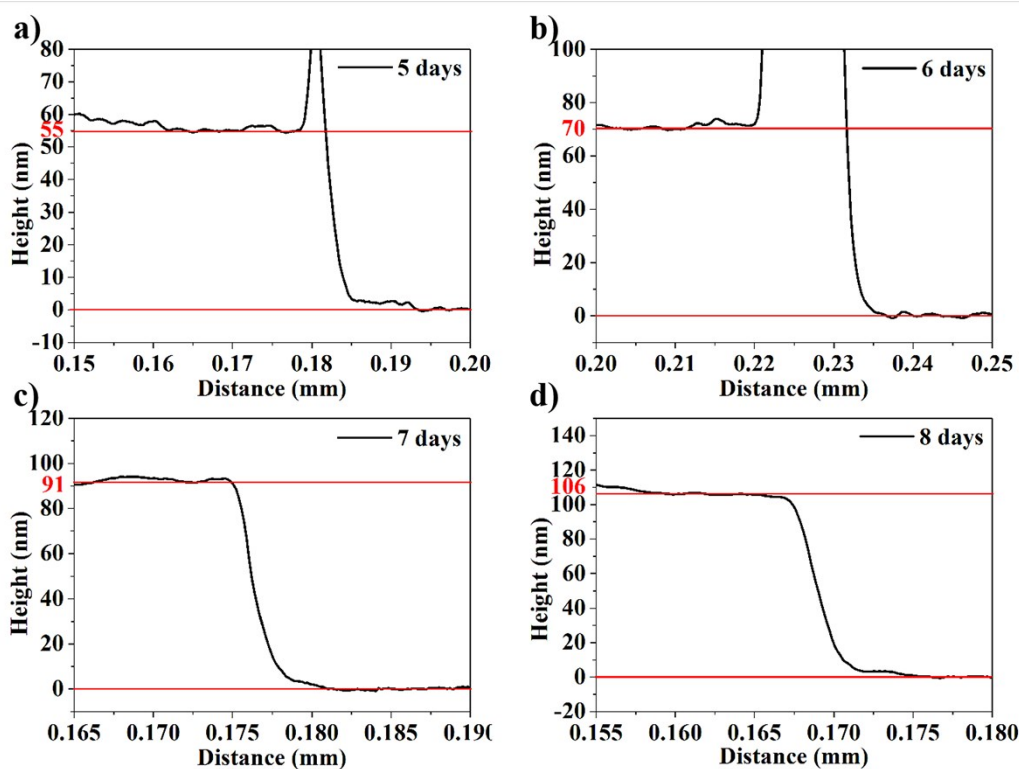

**Fig. S8.** Thickness of the nanosheet with the reaction time for (a) 5 days, (b) 6 days, (c) 7 days and (d) 8 days used in Fig. S5 and S6.

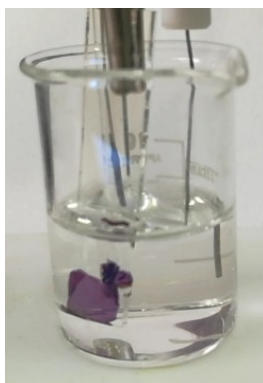

**Fig. S9.** Three electrodes system of electrochromic measurement.
